# Supplementary material
Source: MDPI journal article supplement (https://www.mdpi.com/2073-4344/8/5/193)
Supplement: s1 [file s1 › catalysts-288938-supplementary.pdf]

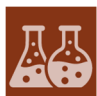

# Supplementary Material: Selective Conversion of Furfural to Cyclopentanone or Cyclopentanol using Co-Ni Catalyst in Water

Yaru Li <sup>1,2</sup>, Xingcui Guo <sup>2,\*</sup>, Daosheng Liu <sup>1</sup>, Xindong Mu <sup>2</sup>, Xiufang Chen <sup>2</sup> and Yan Shi <sup>1,\*</sup>

<sup>1</sup> College of Chemistry, Chemical Engineering and Environmental Engineering, Liaoning Shihua University, 1 Dandong Road, Fushun, Liaoning 113001, China; weixinzhenhaoli@163.com (Y.L.); dsliu05@126.com (D.L.)

<sup>2</sup> CAS Key Laboratory of Bio-based Materials, Qingdao Institute of Bioenergy and Bioprocess Technology, Chinese Academy of Sciences, Qingdao 266101, China; muxd@qibebt.ac.cn (X.M.); chenxf@qibebt.ac.cn (X.C.)

\* Correspondence: guoxc@qibebt.ac.cn (X.G.); shiyan1816@163.com (S.Y.); Tel.: +86-0532-8066-2725 (X.G.)

Received: 20 March 2018; Accepted: 03 May 2018; Published: date

**Table S1** The compositions of 10%Co-10%Ni-TiO<sub>2</sub> catalysts.

| Catalyst                   | Ni content (wt.%) <sup>a</sup> | Co content (wt.%) <sup>b</sup> |
|----------------------------|--------------------------------|--------------------------------|
| Before reaction            | 10                             | 10                             |
| After five reaction cycles | 8.98                           | 9.94                           |

<sup>a, b</sup> Determined by ICP.

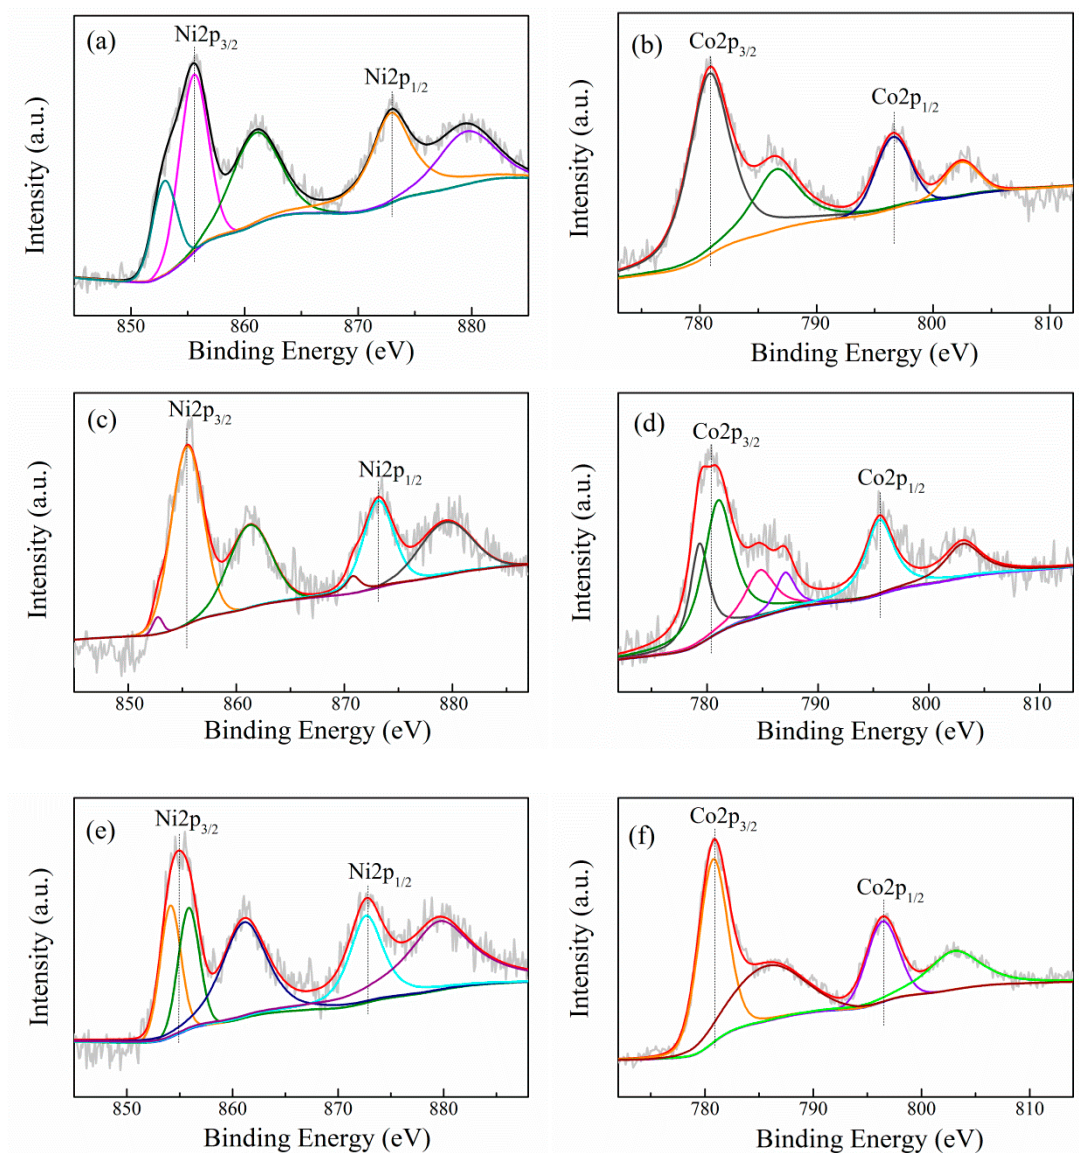

**Figure S1.** XPS spectras and the deconvoluted configurations for (a) 20%Ni/TiO<sub>2</sub>, (b, c) 10%Ni-10%Co/TiO<sub>2</sub>, (d, e) 10%Ni-10%Co/TiO<sub>2</sub>-A and (f) 20%Co/TiO<sub>2</sub> catalysts.

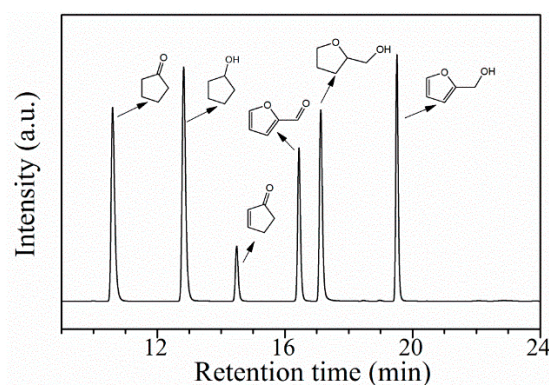

**Figure S2.** Representative GC spectrum of furfural hydrogenation in water over.  
10%Ni-10%Co/TiO<sub>2</sub>.

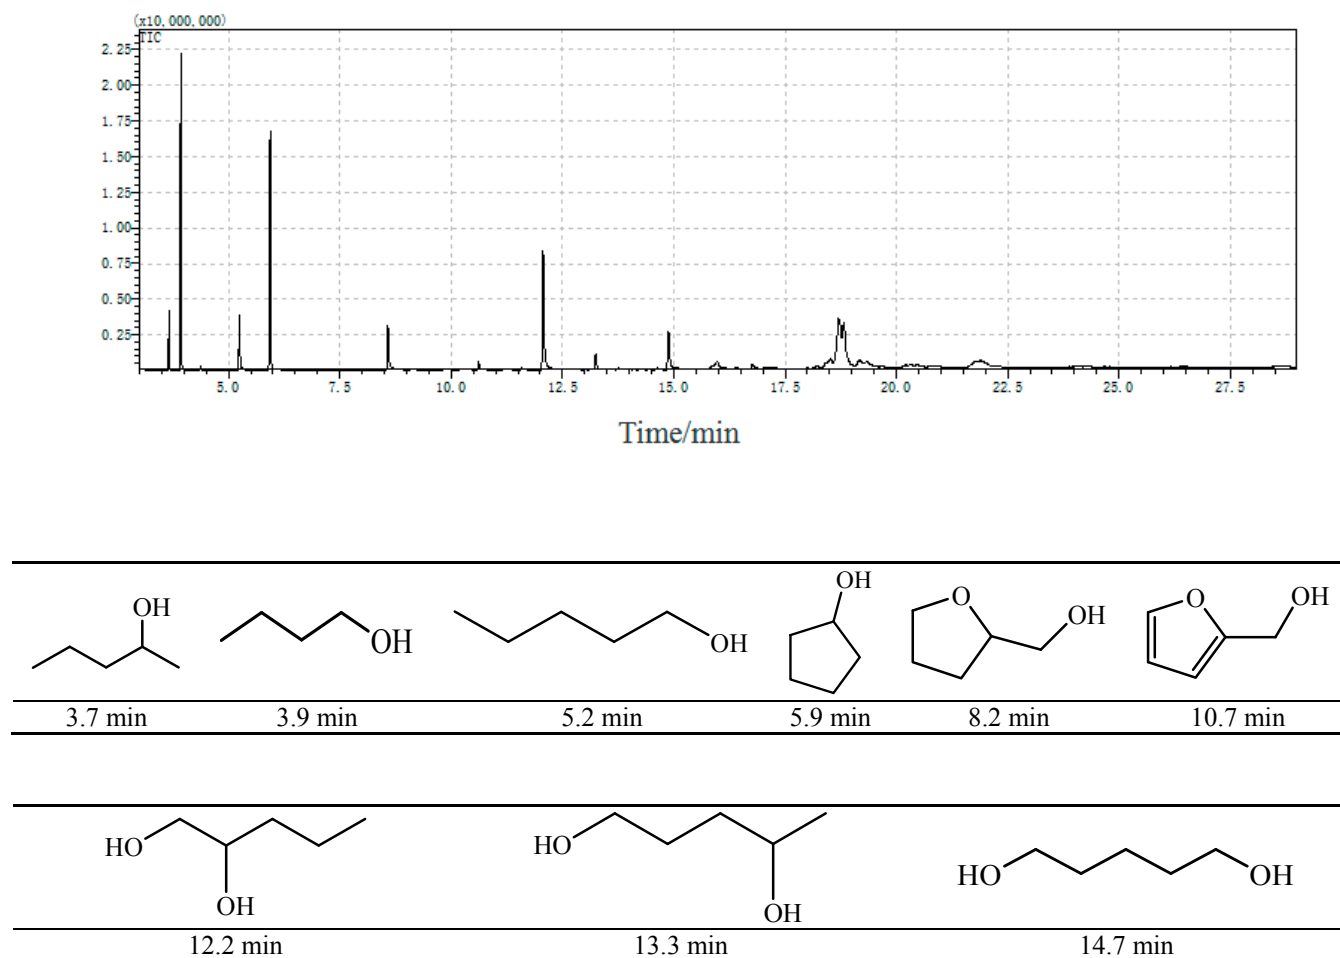

**Figure S3.** The qualitative results for liquid products from furfural hydrogenation by GC-MS.

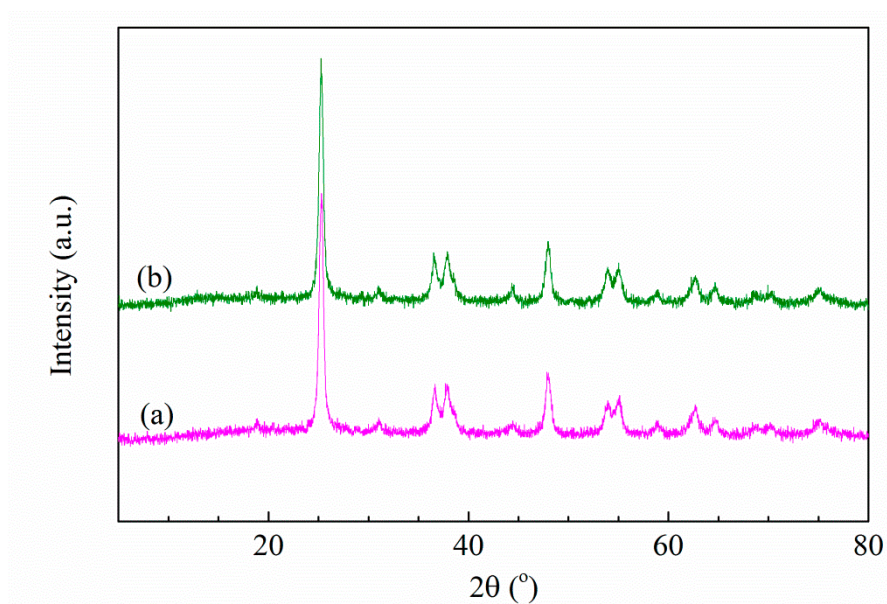

**Figure S4.** XRD patterns of fresh (a) and used (b) 10%Co-10%Ni-TiO<sub>2</sub> catalyst.

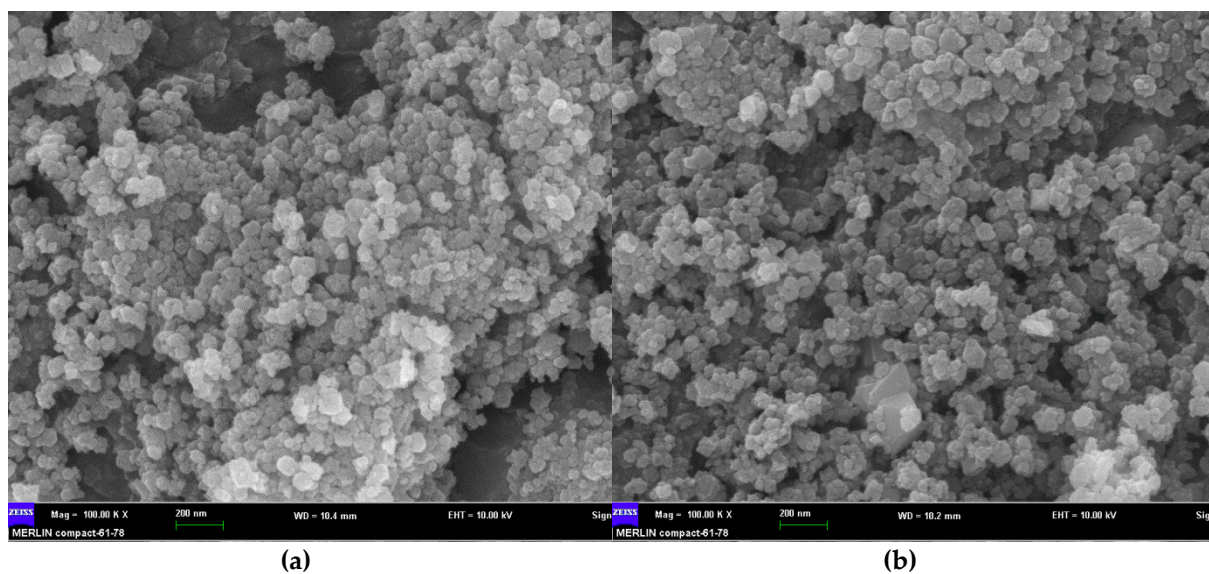

**Figure S5.** SEM micrograph for the fresh (a) and used (b) 10%Co-10%Ni-TiO<sub>2</sub> catalyst.

© 2018 by the authors. Submitted for possible open access publication under the

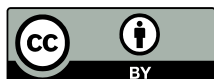

terms and conditions of the Creative Commons Attribution (CC BY) license (<http://creativecommons.org/licenses/by/4.0/>).
